# Supplementary material
Source: PubMed Central journal article supplement (PMC3309732)
Supplement: 1119945109_pnas.201119945SI.pdf [file 1119945109_pnas.201119945SI.pdf]

# Supporting Information

Pearce et al. 10.1073/pnas.1119945109

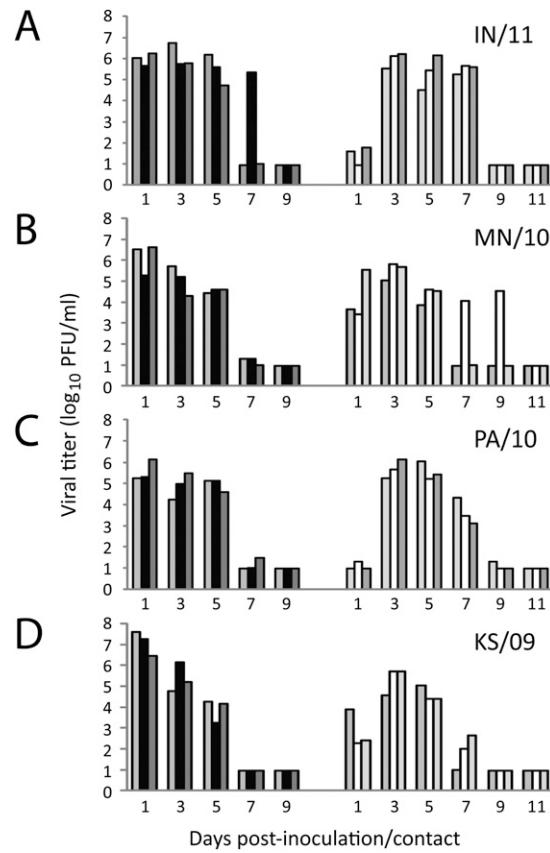

**Fig. S1.** Transmissibility of A(H3N2)v influenza viruses among ferrets in the direct-contact (DC) model. Three ferrets each were inoculated intranasally (i.n.) with  $10^6$  pfu of A/Indiana/08/11 (IN/11) virus (A), A/Minnesota/11/10 (MN/10) virus (B), A/Pennsylvania/14/10 (PA/10) virus (C), or A/Kansas/13/2009 (KS/09) virus (D); a naïve ferret was placed in each cage 24 h after inoculation to initiate contact. Nasal washes were collected from inoculated (dark bars) and contact (light bars) ferrets every other day starting at 1 d postinoculation (dpi) or postcontact (dpc). Titers are expressed as  $\log_{10}$  pfu/mL; the limit of detection was 10 pfu. Values for individual ferrets are shown.

**Table S1. Comparison of receptor-binding site (RBS) of hemagglutinin (HA) of H3N2 influenza viruses**

|                         |                                                        |                            |
|-------------------------|--------------------------------------------------------|----------------------------|
| <b>1967-68 Pandemic</b> |                                                        | <b>133</b>                 |
| A/Aichi/2/1968          | DLFVERSKAFSNCYPYDVPDYASLRSLVASSGTTLEFITEGFTWTGVTQNG    | 150                        |
| <b>Seasonal Strains</b> |                                                        |                            |
| A/Sydney/5/1997         | DLFVERSKAYSNCYPYDVPDYASLRSLVASSGTTLEFNNEFSFNWTGVAQNG   | 134                        |
| A/Moscow/10/1999        | DLFVERSKAYSNCYPYDVPDYASLRSLVASSGTTLEFNNEFSFNWTGVAQNG   | 150                        |
| A/Wyoming/3/2003        | DLFVERSKAYSNCYPYDVPDYASLRSLVASSGTTLEFNNEFSFNWTGVTQNG   | 150                        |
| A/California/7/2004     | DLFVERSKAYSNCYPYDVPDYASLRSLVASSGTTLEFNNEFSFNWTGVTQNG   | 150                        |
| A/Wisconsin/67/2005     | DLFVERSKAYSNCYPYDVPDYASLRSLVASSGTTLEFNDEFSFNWTGVTQNG   | 150                        |
| A/Brisbane/10/2007      | DLFVERSKAYSNCYPYDVPDYASLRSLVASSGTTLEFNNEFSFNWTGVTQNG   | 150                        |
| A/Perth/16/2009         | DLFVERSKAYSNCYPYDVPDYASLRSLVASSGTTLEFNNEFSFNWTGVTQNG   | 150                        |
| <b>TRS H3N2</b>         |                                                        |                            |
| A/Kansas/13/2009        | DLFVERSTAYSNCYPYVVDYASLRSLVASSGTTLEFTEQESFNWTGVTQDG    | 150                        |
| A/Minnesota/11/2010     | DLFVERSTAYSNCYPYVVDYATLRSLVASSGNLEFTEQESFNWTGVAQDG     | 150                        |
| A/Pennsylvania/14/2010  | DLFVERSTAYSNCYPYVVDYVSLRSLVASSGTTLEFTEQENFNWTGVAQDG    | 150                        |
|                         | *****.*:***** ***. :*****.*** *.*:**:* **              |                            |
| <b>1967-68 Pandemic</b> |                                                        | <b>137 145 153 156 183</b> |
| A/Aichi/2/1968          | GSNACKRGPGRGFFSRLNWLTLKSGSTYPVLNVTMPNNDNFDKLYIWGIVHH   | 200                        |
| <b>Seasonal Strains</b> |                                                        |                            |
| A/Sydney/5/1997         | TSYACKRRSISKFFSRLNWLHLKFKYKYPALNVTMPNNDKFDKLYIWGVVHH   | 184                        |
| A/Moscow/10/1999        | TSSACKRRSISKFFSRLNWLHLKFKYKYPALNVTMPNNDKFDKLYIWGVVHH   | 200                        |
| A/Wyoming/3/2003        | TSSACKRRSNKFFSRLNWLTLKFKYKYPALNVTMPNNEKFDKLYIWGVVHH    | 200                        |
| A/California/7/2004     | TSSACKRRSNKFFSRLNWLTLKFKYKYPALNVTMPNNEKFDKLYIWGVVHH    | 200                        |
| A/Wisconsin/67/2005     | TSSACKRRSNKFFSRLNWLTLKFKYKYPALNVTMPNNEKFDKLYIWGVVHH    | 200                        |
| A/Brisbane/10/2007      | TSSACIRRSNKFFSRLNWLTLKFKYKYPALNVTMPNNEKFDKLYIWGVVHH    | 200                        |
| A/Perth/16/2009         | TSSACIRRSNKFFSRLNWLTLNFKYKYPALNVTMPNNEQFDKLYIWGVVHH    | 200                        |
| <b>TRS H3N2</b>         |                                                        |                            |
| A/Kansas/13/2009        | SSYTCRRKSVNSFFSRLNWLHLNLDYKYPALNVTMPNNDKFDKLYIWGVVHH   | 200                        |
| A/Minnesota/11/2010     | SSYACRRKSVNSFFSRLNWLHLNLYKYPEQNVTMPNNDKFDKLYIWGVVHH    | 200                        |
| A/Pennsylvania/14/2010  | SSYACRRKSVNSFFSRLNWLHLNLYKYPALNVTMPNNDNFDKLYIWGVVHH    | 200                        |
|                         | *:* * . :***** ** *****:*****.*                        |                            |
| <b>1967-68 Pandemic</b> |                                                        | <b>190 193 222 225 228</b> |
| A/Aichi/2/1968          | PSTNQDQTSILYVQASGRVTVSTRSQQTIIIPNIGSRPVRVGVSSIRISIIYW  | 250                        |
| <b>Seasonal Strains</b> |                                                        |                            |
| A/Sydney/5/1997         | PSTDSDQTSIYAQASGRVTVSTKRSQQTIVIPNIGSRPVRVGVSSIRISIIHW  | 234                        |
| A/Moscow/10/1999        | PSTDSDQTSILYVQASGRVTVSTKRSQQTIVIPNIGSRPVRVGVSSIRISIIYW | 250                        |
| A/Wyoming/3/2003        | PVTDSDQISLYAQAASGRITVSTKRSQQTIVIPNIGYRPPVRDISIRISIIYW  | 250                        |
| A/California/7/2004     | PVTNNDQISLYVQASGRITVSTKRSQQTIVIPNIGSRPVRVDIPSRISIIYW   | 250                        |
| A/Wisconsin/67/2005     | PVTDNDQIFLYAQAASGRITVSTKRSQQTIVIPNIGSRPEIRNIPSRISIIYW  | 250                        |
| A/Brisbane/10/2007      | PVTDNDQIFPYAQAASGRITVSTKRSQQTIVIPNIGSRPVRVNIIPSRISIIYW | 250                        |
| A/Perth/16/2009         | PVTDNDQIFLYAQAASGRITVSTKRSQQTIVIPNIGSRPVRVNIIPSRISIIYW | 250                        |
| <b>TRS H3N2</b>         |                                                        |                            |
| A/Kansas/13/2009        | PVTDNDQTNLYVQASGRVTVSTKRSQQTIVIPNIGSRPVRVGVSSIIISIIYW  | 250                        |
| A/Minnesota/11/2010     | PVTDNDQTNLYVQASGRVTVSTKRSQQTIVIPNIGSRPVRVGVSSIIISIIYW  | 250                        |
| A/Pennsylvania/14/2010  | PVTDNDQTNLYVQASGRVTVSTKRSQQTIVIPNIGSRPVRVGVSSIIISIIYW  | 250                        |
|                         | *:* :* * *****: *****: ***** ** :*:* ** ** *           |                            |

Shown is the sequence alignment of the part of the head region of HA1 that comprises the RBS; the residue positions highlighted in green are those that are critically involved in glycan-receptor binding.

**Table S2. Expanded nomenclature of glycans used in the glycan array**

| Glycan      | Expanded nomenclature                                                                                                 |
|-------------|-----------------------------------------------------------------------------------------------------------------------|
| 3'SLN       | Neu5Ac $\alpha$ 2-3Gal $\beta$ 1-4GlcNAc $\beta$ 1-                                                                   |
| 6'SLN       | Neu5Ac $\alpha$ 2-6Gal $\beta$ 1-4GlcNAc $\beta$ 1-                                                                   |
| 3'SLN-LN    | Neu5Ac $\alpha$ 2-3Gal $\beta$ 1-4GlcNAc $\beta$ 1-3Gal $\beta$ 1-4GlcNAc $\beta$ 1-                                  |
| 6'SLN-LN    | Neu5Ac $\alpha$ 2-6Gal $\beta$ 1-4GlcNAc $\beta$ 1-3Gal $\beta$ 1-4GlcNAc $\beta$ 1-                                  |
| 3'SLN-LN-LN | Neu5Ac $\alpha$ 2-3Gal $\beta$ 1-4GlcNAc $\beta$ 1-3Gal $\beta$ 1-4GlcNAc $\beta$ 1-3Gal $\beta$ 1-4GlcNAc $\beta$ 1- |

All of the sugars are linked via a spacer to biotin (-Sp-LC-LC-biotin as described at <http://www.functionalglycomics.org/static/consortium/resources/resourcecored5.shtml>).  $\alpha/\beta$ , anomeric configuration of the pyranose sugars; Gal, D-galactose; GlcNAc, N-acetyl D-glucosamine; Neu5Ac, N-acetyl D-neuraminic acid.
